# Supplementary material for: Functionally gradient three-dimensional graphene foam-based polymeric scaffolds for multilayered tissue regeneration
Source: Royal Society of Chemistry journal article supplement (doi:10.1039/d2ra06018c), 2023-01-01
Supplement: d2ra06018c1.pdf [file d2ra06018c1.pdf]

## **Functionally gradient three-dimensional graphene foam based polymeric scaffold for multilayered tissue regeneration**

*Supplementary data*

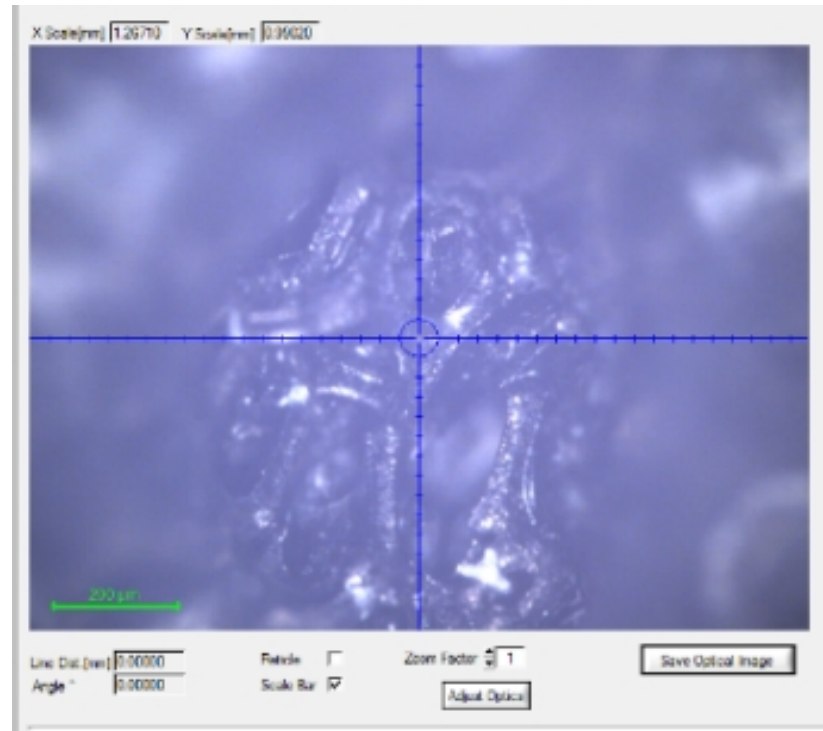

*Figure S1. Optical image representative of typical nanoindentation test location on the scaffold.*

## Porosity of the fabricated scaffold: Micro-CT analysis

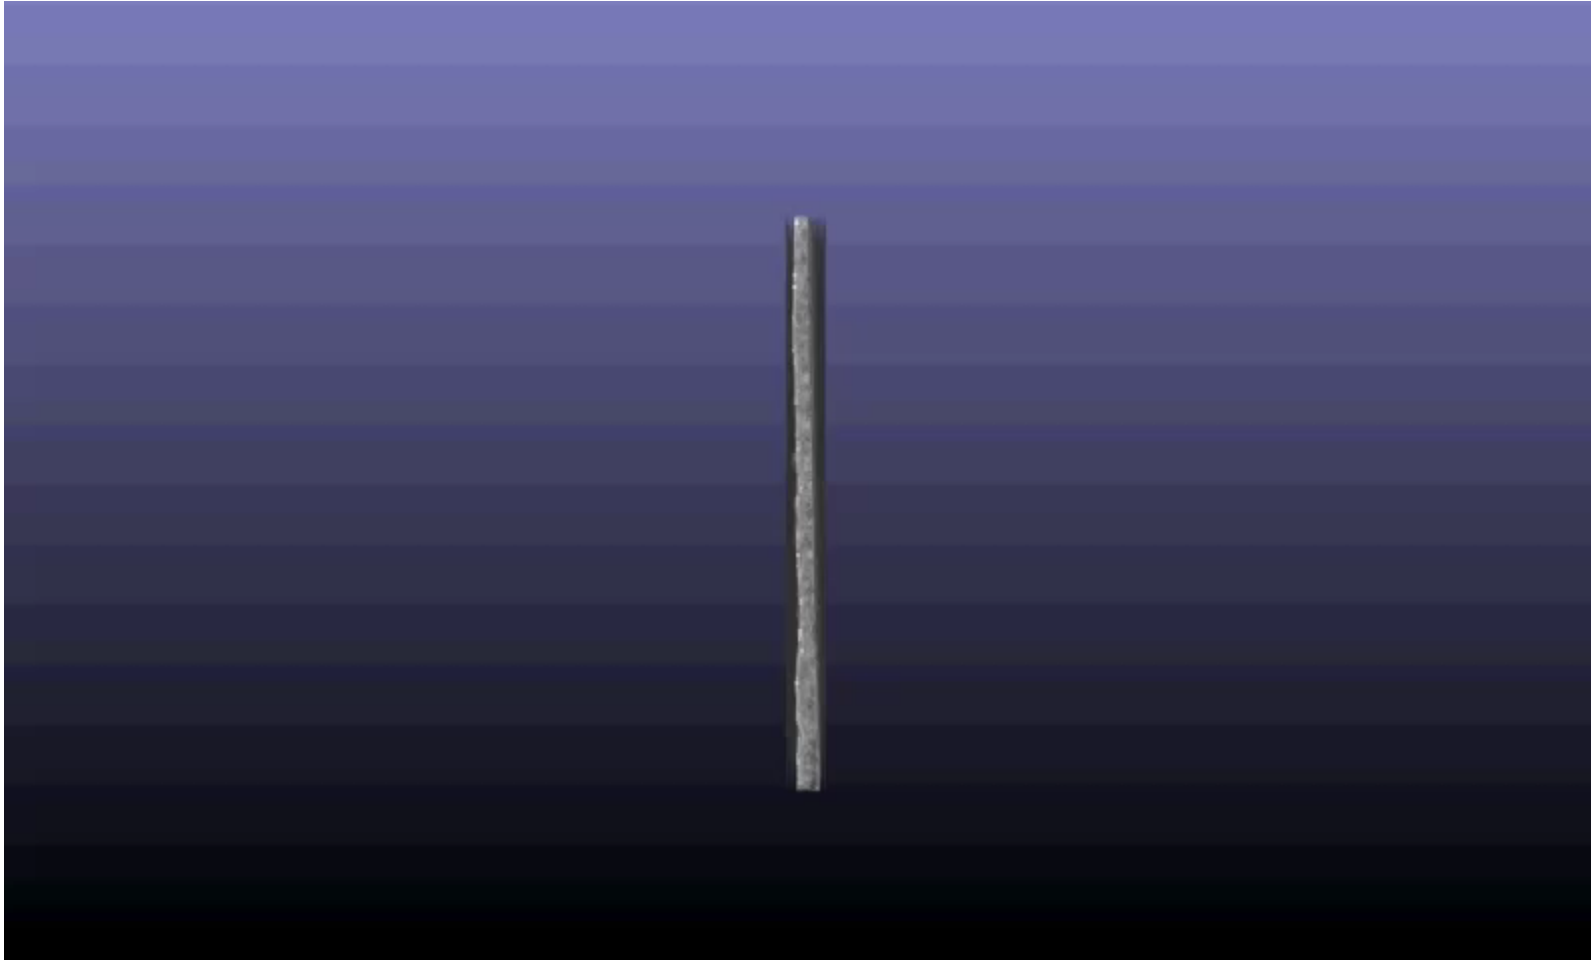

*Figure S2. Video showing the 3D porosity of the fabricated trilayered GF based scaffolds.*

## Huh7 cells (Liver cell)

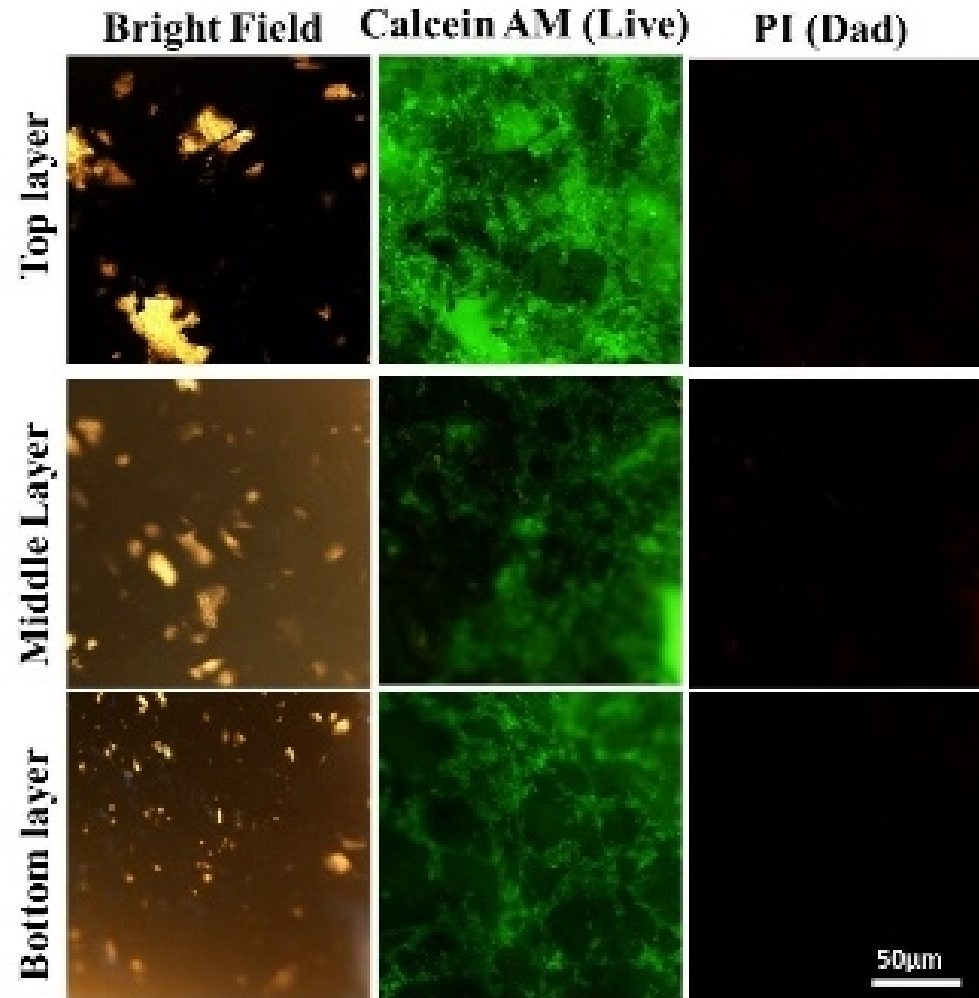

*Figure S3. Cell staining performed on scaffolds, the images depict the live and dead staining for Huh7 cells in all 3 distinct layers. Calcein AM and PI dyes stain live (green) and dead cells (red) respectively.*

## N2a (Neuron)

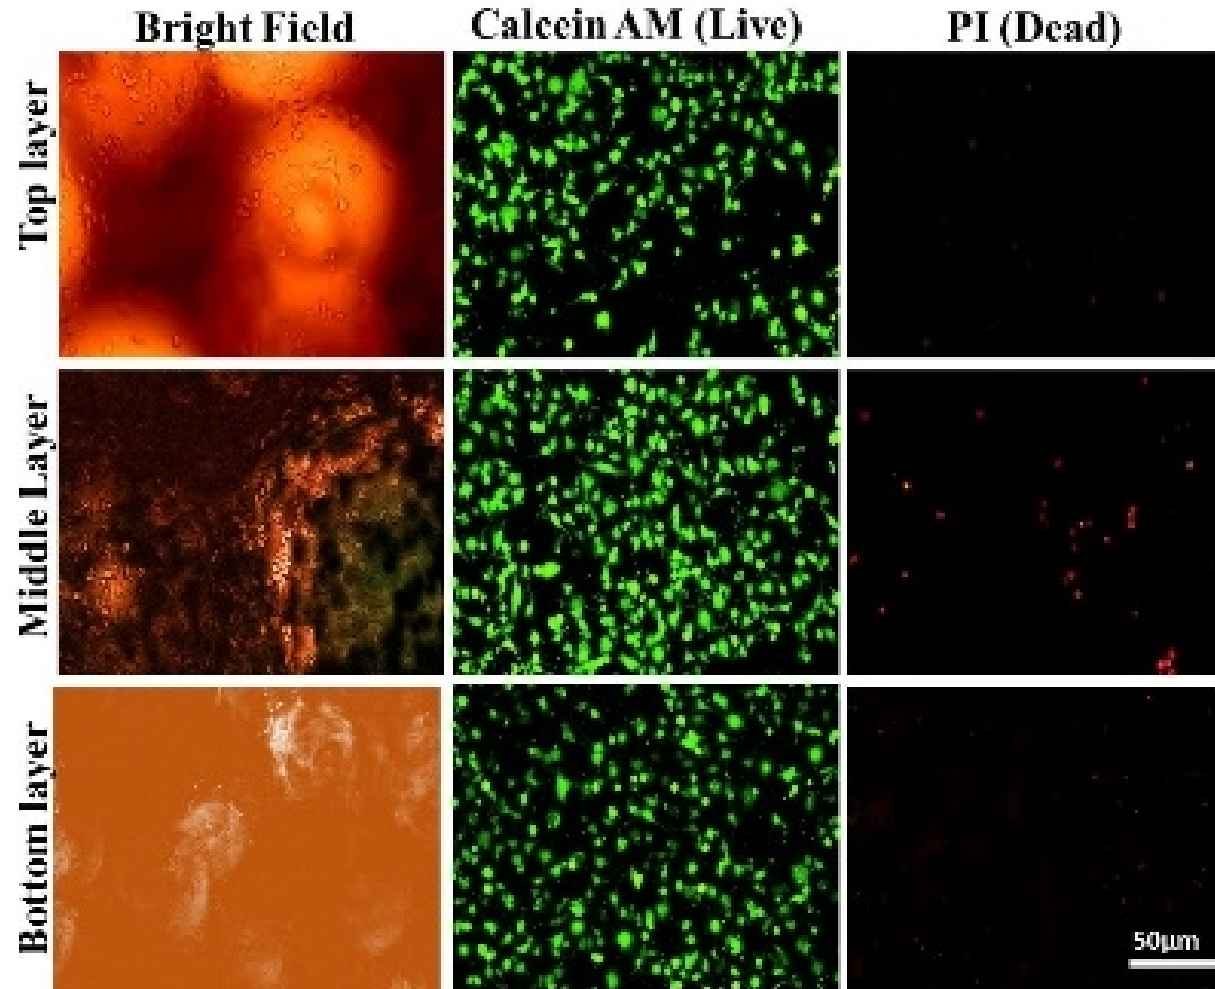

*Figure S4. Cell staining performed on scaffolds, the images depict the live and dead staining for N2a cells in all 3 distinct layers. Calcein AM and PI dyes stain live (green) and dead cells (red) respectively.*
